# Supplementary material for: Machine-learning-assisted molecular design of phenylnaphthylamine-type antioxidants
Source: Royal Society of Chemistry journal article supplement (doi:10.1039/d2cp00083k), 2022-01-01
Supplement: d2cp00083k1.xlsx [file d2cp00083k1.xlsx]

## Sheet: Table S1. Original data set
	Table S1. Original data set
	Inputs (Values of the number of group or MCI values of antioxidant structure）														Outputs
	(The integers 1 to 13 correspond to the serial number of groups or MCI listed in Table 2 in the main text )
	1	2	3	4	5	6	7	8	9	10	11	12	13		BDE(kJ·mol-1)	δ((J·cm-3)0.5)	Ebinding(kcal·mol-1)
	1	0	0	0	0	0	0	0	0	0	2.842	2.011	1.384		334.1	22.86	196.46
	1	0	1	0	0	0	0	0	0	0	2.936	2.102	1.411		287.71	23.42	203.38
	1	0	1	0	0	0	0	0	0	0	2.919	2.047	1.438		323.38	24.44	222.29
	1	0	1	0	0	0	0	0	0	0	2.917	2.057	1.419		327.91	24.53	221.63
	1	0	1	0	0	0	0	0	0	0	2.952	2.079	1.418		324.56	24.54	185.21
	1	0	1	0	0	0	0	0	0	0	2.954	2.069	1.429		332.55	24.47	194.47
	1	0	1	0	0	0	0	0	0	0	2.899	2.075	1.426		336.28	24.57	204.06
	1	0	1	0	0	0	0	0	0	0	2.95	2.057	1.439		320.41	23.26	166.39
	1	0	1	0	0	0	0	0	0	0	2.963	2.059	1.413		316.86	23.41	201.67
	1	0	1	0	0	0	0	0	0	0	2.915	2.074	1.401		333.3	24.33	204.62
	1	0	1	0	0	0	0	0	0	0	2.936	2.035	1.425		315.92	24.63	189.66
	1	0	0	0	0	0	0	1	0	0	3.166	2.31	1.524		320.69	21.85	183.64
	1	0	0	0	0	0	0	1	0	0	3.09	2.172	1.576		330.89	22.02	197.93
	1	0	0	0	0	0	0	1	0	0	3.089	2.189	1.534		328.28	22.09	203.68
	1	0	0	0	0	0	0	1	0	0	3.193	2.253	1.532		336.6	22.29	182.43
	1	0	0	0	0	0	0	1	0	0	3.195	2.236	1.562		337.97	22.32	195.42
	1	0	0	0	0	0	0	1	0	0	3.059	2.241	1.558		333.48	22.13	206.04
	1	0	0	0	0	0	0	1	0	0	3.18	2.212	1.592		337.11	21.75	180.26
	1	0	0	0	0	0	0	1	0	0	3.204	2.193	1.508		324.89	21.8	197.87
	1	0	0	0	0	0	0	1	0	0	3.087	2.213	1.474		326.48	22.15	204.39
	1	0	0	0	0	0	0	1	0	0	3.12	2.127	1.524		336.09	22.13	201.74
	1	0	0	0	0	0	0	1	3	0	3.843	2.775	1.99		313.78	20.23	204.51
	1	0	0	0	0	0	0	1	3	0	3.818	2.642	1.931		324.9	20.98	219.11
	1	0	0	0	0	0	0	1	3	0	3.817	2.656	1.907		335.33	21.12	224.98
	1	0	0	0	0	0	0	1	3	0	3.865	2.746	1.973		326.3	21.04	183.83
	1	0	0	0	0	0	0	1	3	0	3.867	2.733	1.987		330.98	21.06	221.1
	1	0	0	0	0	0	0	1	3	0	3.793	2.678	1.944		335.87	21.05	223.52
	1	0	0	0	0	0	0	1	3	0	3.858	2.706	1.989		338.5	20.13	216.34
	1	0	0	0	0	0	0	1	3	0	3.876	2.707	1.924		327.76	20.36	230.09
	1	0	0	0	0	0	0	1	3	0	3.815	2.675	1.875		321.32	20.93	220.85
	1	0	0	0	0	0	0	1	3	0	3.842	2.626	1.877		331.72	21.1	211.75
	1	0	0	0	0	0	0	1	5	0	4.343	3.15	2.199		319.98	19.74	229.77
	1	0	0	0	0	0	0	1	5	0	4.318	3.017	2.136		327.51	20.31	253.27
	1	0	0	0	0	0	0	1	5	0	4.317	3.031	2.112		322.42	20.6	255.5
	1	0	0	0	0	0	0	1	5	0	4.365	3.121	2.183		334.35	20.56	258.24
	1	0	0	0	0	0	0	1	5	0	4.117	2.931	2.056		327.49	20.44	256.76
	1	0	0	0	0	0	0	1	5	0	4.293	3.053	2.15		329.59	20.43	239.66
	1	0	0	0	0	0	0	1	5	0	4.358	3.081	2.199		341.77	19.63	238.45
	1	0	0	0	0	0	0	1	5	0	4.376	3.082	2.133		324.54	20.14	230.97
	1	0	0	0	0	0	0	1	5	0	4.315	3.05	2.081		337.25	20.44	263.7
	1	0	0	0	0	0	0	1	5	0	4.342	3.001	2.082		324.52	20.69	245.87
	1	0	0	0	0	0	0	1	7	0	4.843	3.504	2.449		324.66	19.58	244.48
	1	0	0	0	0	0	0	1	7	0	4.818	3.371	2.386		331.64	20.08	263.37
	1	0	0	0	0	0	0	1	7	0	4.817	3.384	2.362		331.56	20.33	268.56
	1	0	0	0	0	0	0	1	7	0	4.865	3.475	2.433		327.35	20.2	262.94
	1	0	0	0	0	0	0	1	7	0	4.867	3.461	2.446		324.08	20.22	274.48
	1	0	0	0	0	0	0	1	7	0	4.793	3.407	2.4		328.35	20.05	276.43
	1	0	0	0	0	0	0	1	7	0	4.858	3.434	2.449		333.91	19.51	268.97
	1	0	0	0	0	0	0	1	7	0	4.876	3.436	2.383		324.05	19.66	261.57
	1	0	0	0	0	0	0	1	7	0	4.815	3.404	2.331		337.16	20.32	270.43
	1	0	0	0	0	0	0	1	7	0	4.842	3.354	2.332		320.16	20.35	288.49
	1	0	0	0	0	0	0	5	1	2	4.659	4.107	2.289		323.79	18.74	224.04
	1	0	0	0	0	0	0	5	1	2	4.689	3.907	2.12		338.26	18.92	231.2
	1	0	0	0	0	0	0	5	1	2	4.687	3.919	2.114		340.57	19.43	238.86
	1	0	0	0	0	0	0	5	1	2	4.676	4.107	2.217		330.88	19.31	232.99
	1	0	0	0	0	0	0	5	1	2	4.678	4.096	2.212		341.25	19.14	244.36
	1	0	0	0	0	0	0	5	1	2	4.668	3.91	2.202		329.15	18.81	245.56
	1	0	0	0	0	0	0	5	1	2	4.674	4.057	2.193		341.81	18.22	233.96
	1	0	0	0	0	0	0	5	1	2	4.687	4.083	2.113		327.77	18.51	220.54
	1	0	0	0	0	0	0	5	1	2	4.685	3.936	2.11		338.61	18.9	256.97
	1	0	0	0	0	0	0	5	1	2	4.707	3.923	2.025		330.78	19.25	254.91
	1	0	0	0	0	1	0	1	0	0	3.139	2.258	1.556		336.8	22.15	192.9
	1	0	0	0	0	1	0	1	0	0	3.142	2.165	1.521		336.79	22.75	207.71
	1	0	0	0	0	1	0	1	0	0	3.14	2.175	1.508		340.56	22.93	199.26
	1	0	0	0	0	1	0	1	0	0	3.155	2.245	1.539		329.43	22.78	208.51
	1	0	0	0	0	1	0	1	0	0	3.157	2.235	1.543		338.53	22.88	212.95
	1	0	0	0	0	1	0	1	0	0	3.124	2.181	1.539		328.78	22.95	174.46
	1	0	0	0	0	1	0	1	0	0	3.154	2.216	1.543		339.84	22.11	179.78
	1	0	0	0	0	1	0	1	0	0	3.166	2.227	1.506		337.53	22.27	185.72
	1	0	0	0	0	1	0	1	0	0	3.138	2.191	1.498		335.24	22.96	208.18
	1	0	0	0	0	1	0	1	0	0	3.159	2.164	1.486		334.67	22.86	218.18
	1	0	0	0	0	1	0	1	1	0	3.219	2.364	1.632		338.26	21.42	197.5
	1	0	0	0	0	1	0	1	1	0	3.217	2.294	1.583		339.34	22.28	203.28
	1	0	0	0	0	1	0	1	1	0	3.216	2.304	1.569		342.08	22.49	236.15
	1	0	0	0	0	1	0	1	1	0	3.235	2.348	1.627		337.5	22.27	201.51
	1	0	0	0	0	1	0	1	1	0	3.237	2.339	1.633		326.24	22.27	190.51
	1	0	0	0	0	1	0	1	1	0	3.199	2.313	1.586		325.26	22.36	230.95
	1	0	0	0	0	1	0	1	1	0	3.234	2.322	1.63		327.58	21.29	195.86
	1	0	0	0	0	1	0	1	1	0	3.246	2.331	1.603		332.85	21.68	202.98
	1	0	0	0	0	1	0	1	1	0	3.214	2.32	1.558		328.99	22.19	203.17
	1	0	0	0	0	1	0	1	1	0	3.234	2.291	1.562		327.86	22.36	214.12
	1	0	0	0	0	1	0	1	3	0	3.675	2.534	1.747		345.68	20.68	245.34
	1	0	0	0	0	1	0	1	3	0	3.673	2.462	1.712		338.98	21.36	222.88
	1	0	0	0	0	1	0	1	3	0	3.671	2.472	1.699		328.69	21.68	239.63
	1	0	0	0	0	1	0	1	3	0	3.69	2.519	1.74		333.24	21.33	228.84
	1	0	0	0	0	1	0	1	3	0	3.692	2.51	1.746		307.88	21.38	236.77
	1	0	0	0	0	1	0	1	3	0	3.655	2.481	1.718		327.12	21.54	223.41
	1	0	0	0	0	1	0	1	3	0	3.689	2.493	1.745		335.18	20.65	216.24
	1	0	0	0	0	1	0	1	3	0	3.701	2.502	1.716		332.54	20.83	234.49
	1	0	0	0	0	1	0	1	3	0	3.669	2.488	1.687		332.36	21.54	242.16
	1	0	0	0	0	1	0	1	3	0	3.69	2.459	1.689		318.6	21.65	232.71
	1	0	0	0	0	1	0	1	5	0	4.175	2.919	1.974		350.97	20.11	233.09
	1	0	0	0	0	1	0	1	5	0	4.173	2.846	1.94		342.23	20.86	248.92
	1	0	0	0	0	1	0	1	5	0	4.171	2.856	1.926		327.87	21.04	248.92
	1	0	0	0	0	1	0	1	5	0	4.19	2.904	1.968		327.03	20.86	273.23
	1	0	0	0	0	1	0	1	5	0	4.192	2.894	1.974		316.52	21.03	248.18
	1	0	0	0	0	1	0	1	5	0	4.155	2.866	1.945		329	20.88	243.68
	1	0	0	0	0	1	0	1	5	0	4.189	2.878	1.972		325.82	20.05	244.2
	1	0	0	0	0	1	0	1	5	0	4.201	2.886	1.943		329.46	20	237.4
	1	0	0	0	0	1	0	1	5	0	4.169	2.872	1.915		342.24	21	239.73
	1	0	0	0	0	1	0	1	5	0	4.19	2.843	1.917		314.91	21.3	243.21
	1	0	0	0	0	1	0	1	7	0	4.675	3.273	2.224		344.35	19.87	229.56
	1	0	0	0	0	1	0	1	7	0	4.673	3.2	2.19		331.73	20.44	273.7
	1	0	0	0	0	1	0	1	7	0	4.671	3.21	2.176		342.18	20.42	266.55
	1	0	0	0	0	1	0	1	7	0	4.69	3.258	2.218		314.41	20.44	278.75
	1	0	0	0	0	1	0	1	7	0	4.692	3.248	2.224		321.79	20.66	276.62
	1	0	0	0	0	1	0	1	7	0	4.655	3.219	2.195		338.57	20.46	266.09
	1	0	0	0	0	1	0	1	7	0	4.689	3.231	2.222		334.91	19.85	240.88
	1	0	0	0	0	1	0	1	7	0	4.701	3.24	2.193		339.48	19.71	259.98
	1	0	0	0	0	1	0	1	7	0	4.669	3.226	2.165		333.11	20.59	285.49
	1	0	0	0	0	1	0	1	7	0	4.69	3.197	2.167		324.97	20.69	269.14
	1	0	0	1	0	0	0	0	0	0	2.99	2.151	1.438		295.33	23.94	173.94
	1	0	0	1	0	0	0	0	0	0	2.959	2.076	1.47		328.74	24.37	199.58
	1	0	0	1	0	0	0	0	0	0	2.957	2.088	1.446		325.26	24.65	201.51
	1	0	0	1	0	0	0	0	0	0	3.009	2.12	1.445		332.29	24.62	203.1
	1	0	0	1	0	0	0	0	0	0	3.011	2.108	1.46		314.58	24.64	216.32
	1	0	0	1	0	0	0	0	0	0	2.937	2.114	1.457		330.96	24.52	212.33
	1	0	0	1	0	0	0	0	0	0	3.004	2.094	1.475		313	23.88	208.06
	1	0	0	1	0	0	0	0	0	0	3.02	2.09	1.436		307.95	24.12	195.66
	1	0	0	1	0	0	0	0	0	0	2.955	2.106	1.418		326.83	24.4	200.77
	1	0	0	1	0	0	0	0	0	0	2.979	2.056	1.448		312.76	24.64	198.6
	1	0	0	0	0	0	1	0	0	0	3.132	2.254	1.548		333.05	22.45	182.24
	1	0	0	0	0	0	1	0	0	0	3.129	2.16	1.521		333.31	23.29	187.49
	1	0	0	0	0	0	1	0	0	0	3.128	2.171	1.506		335.16	23.5	181.92
	1	0	0	0	0	0	1	0	0	0	3.149	2.239	1.533		331.26	23.62	194.86
	1	0	0	0	0	0	1	0	0	0	3.151	2.228	1.539		333.04	23.56	196.96
	1	0	0	0	0	0	1	0	0	0	3.11	2.181	1.535		335.27	23.38	198.22
	1	0	0	0	0	0	1	0	0	0	3.147	2.209	1.542		357.31	22.13	191.09
	1	0	0	0	0	0	1	0	0	0	3.16	2.218	1.502		359.43	22.24	189.63
	1	0	0	0	0	0	1	0	0	0	3.126	2.187	1.493		334.12	23.63	190.98
	1	0	0	0	0	0	1	0	0	0	3.147	2.156	1.486		333.08	23.64	221.63
	1	0	0	0	1	0	0	3	0	1	3.734	2.426	1.722		319.36	20.36	243.19
	1	0	0	0	1	0	0	3	0	1	3.729	2.361	1.709		334.88	20.83	242.27
	1	0	0	0	1	0	0	3	0	1	3.728	2.371	1.694		324.5	21.13	254.66
	1	0	0	0	1	0	0	3	0	1	3.75	2.409	1.72		336.12	20.94	223.43
	1	0	0	0	1	0	0	3	0	1	3.752	2.399	1.727		323.48	20.92	256.63
	1	0	0	0	1	0	0	3	0	1	3.711	2.383	1.708		330.98	21.1	226.82
	1	0	0	0	1	0	0	3	0	1	3.749	2.384	1.728		338.18	20.39	221.6
	1	0	0	0	1	0	0	3	0	1	3.761	2.391	1.702		322.98	20.36	237.15
	1	0	0	0	1	0	0	3	0	1	3.726	2.387	1.682		338.56	21.1	240.88
	1	0	0	0	1	0	0	3	0	1	3.746	2.356	1.69		327.76	21.04	247.9
	1	1	0	0	0	0	0	0	0	0	4.986	3.649	2.592		330.03	21.85	267.25
	1	1	0	0	0	0	0	0	0	0	4.973	3.57	2.559		321.94	22.82	287.08
	1	1	0	0	0	0	0	0	0	0	4.971	3.581	2.541		327.65	22.81	300.75
	1	1	0	0	0	0	0	0	0	0	5.003	3.628	2.589		330.11	22.88	295.22
	1	1	0	0	0	0	0	0	0	0	5.005	3.617	2.599		312.65	22.76	284.01
	1	1	0	0	0	0	0	0	0	0	4.953	3.597	2.559		340.52	22.74	294.41
	1	1	0	0	0	0	0	0	0	0	5.001	3.599	2.6		330.53	21.93	296.79
	1	1	0	0	0	0	0	0	0	0	5.015	3.603	2.565		311.25	22.3	291.56
	1	1	0	0	0	0	0	0	0	0	4.969	3.598	2.522		324.08	23.01	255.26
	1	1	0	0	0	0	0	0	0	0	4.992	3.561	2.534		324.38	23.1	295.38
	0	1	0	0	0	0	0	0	0	0	2.812	1.955	1.354		345.3	22.97	194.86
	0	1	1	0	0	0	0	0	0	0	2.922	2.022	1.389		333.59	24.78	210.86
	0	1	1	0	0	0	0	0	0	0	2.886	2	1.393		334.89	24.84	216.82
	0	1	1	0	0	0	0	0	0	0	2.886	1.999	1.4		333.85	24.74	211.64
	0	1	1	0	0	0	0	0	0	0	2.92	2.032	1.37		340.16	24.81	194.6
	0	1	1	0	0	0	0	0	0	0	2.902	2.051	1.377		333.11	24.52	213.27
	0	1	1	0	0	0	0	0	0	0	2.917	2.005	1.41		341.92	23.65	291.06
	0	1	1	0	0	0	0	0	0	0	2.953	2.033	1.389		335.68	23.42	183.83
	0	1	1	0	0	0	0	0	0	0	2.933	2.002	1.388		332.88	23.83	201.98
	0	1	1	0	0	0	0	0	0	0	2.884	2.017	1.37		341.52	24.87	208.79
	0	1	1	0	0	0	0	0	0	0	2.905	1.979	1.395		330.06	24.72	215.68
	0	1	0	0	0	0	0	1	0	0	3.163	2.195	1.504		340.22	22.51	188.42
	0	1	0	0	0	0	0	1	0	0	3.058	2.132	1.512		340.22	22.58	185.31
	0	1	0	0	0	0	0	1	0	0	3.058	2.131	1.522		338.29	22.3	200.25
	0	1	0	0	0	0	0	1	0	0	3.161	2.212	1.463		339.44	22.4	208.16
	0	1	0	0	0	0	0	1	0	0	3.131	2.263	1.49		338.35	22.28	165.21
	0	1	0	0	0	0	0	1	0	0	3.145	2.166	1.565		346.29	21.97	192.37
	0	1	0	0	0	0	0	1	0	0	3.251	2.239	1.525		338.8	22.12	188.8
	0	1	0	0	0	0	0	1	0	0	3.174	2.136	1.485		339.99	21.84	198.32
	0	1	0	0	0	0	0	1	0	0	3.056	2.157	1.443		332.41	22.37	201.59
	0	1	0	0	0	0	0	1	0	0	3.09	2.071	1.494		334.6	22.53	193.42
	0	1	0	0	0	0	0	1	3	0	3.835	2.689	1.944		333.32	21.03	231.17
	0	1	0	0	0	0	0	1	3	0	3.786	2.599	1.882		341.84	21.17	220.63
	0	1	0	0	0	0	0	1	3	0	3.786	2.598	1.891		337.35	21.28	245.31
	0	1	0	0	0	0	0	1	3	0	3.833	2.702	1.92		334.33	21.19	213.45
	0	1	0	0	0	0	0	1	3	0	3.81	2.724	1.959		339.2	21.16	236.51
	0	1	0	0	0	0	0	1	3	0	3.824	2.655	1.964		332.21	20.54	222.17
	0	1	0	0	0	0	0	1	3	0	3.874	2.753	2.007		329.36	20.42	205.31
	0	1	0	0	0	0	0	1	3	0	3.846	2.65	1.899		339.81	20.55	209.4
	0	1	0	0	0	0	0	1	3	0	3.784	2.619	1.845		337.54	21.14	227.73
	0	1	0	0	0	0	0	1	3	0	3.811	2.569	1.847		336.55	21.35	230.71
	0	1	0	0	0	0	0	1	5	0	4.335	3.064	2.154		341.45	20.57	248.6
	0	1	0	0	0	0	0	1	5	0	4.286	2.974	2.088		345.16	20.87	270.57
	0	1	0	0	0	0	0	1	5	0	4.286	2.973	2.096		341.67	20.8	244.99
	0	1	0	0	0	0	0	1	5	0	4.333	3.077	2.13		331.26	20.76	246.66
	0	1	0	0	0	0	0	1	5	0	4.31	3.099	2.168		343.31	20.51	244.55
	0	1	0	0	0	0	0	1	5	0	4.324	3.03	2.174		335.58	20.1	238.3
	0	1	0	0	0	0	0	1	5	0	4.374	3.128	2.22		327.1	19.98	244.42
	0	1	0	0	0	0	0	1	5	0	4.346	3.025	2.108		331.66	20.33	248.45
	0	1	0	0	0	0	0	1	5	0	4.284	2.994	2.05		339.91	20.6	227.95
	0	1	0	0	0	0	0	1	5	0	4.311	2.944	2.052		327.34	20.89	240.97
	0	1	0	0	0	0	0	1	7	0	4.835	3.417	2.404		342.47	20.05	271.04
	0	1	0	0	0	0	0	1	7	0	4.786	3.327	2.338		333.77	20.34	279.05
	0	1	0	0	0	0	0	1	7	0	4.786	3.326	2.346		341.06	20.45	282.88
	0	1	0	0	0	0	0	1	7	0	4.833	3.43	2.38		328.53	20.41	265.93
	0	1	0	0	0	0	0	1	7	0	4.81	3.453	2.418		328.78	20.1	277.5
	0	1	0	0	0	0	0	1	7	0	4.824	3.383	2.424		327.61	19.94	253.02
	0	1	0	0	0	0	0	1	7	0	4.874	3.481	2.47		321.93	19.67	256.56
	0	1	0	0	0	0	0	1	7	0	4.846	3.379	2.358		342.65	19.77	250.46
	0	1	0	0	0	0	0	1	7	0	4.784	3.348	2.3		333.66	20.38	264.05
	0	1	0	0	0	0	0	1	7	0	4.811	3.298	2.302		329.24	20.37	254.36
	0	1	0	0	0	0	0	5	1	2	4.646	4.05	2.186		337.85	19.04	235.36
	0	1	0	0	0	0	0	5	1	2	4.656	3.861	2.089		331.59	19.62	247.48
	0	1	0	0	0	0	0	5	1	2	4.656	3.86	2.096		340.3	19.44	264.86
	0	1	0	0	0	0	0	5	1	2	4.644	4.061	2.18		340.5	19.34	220.62
	0	1	0	0	0	0	0	5	1	2	4.626	4.052	2.266		346.05	19.36	242.95
	0	1	0	0	0	0	0	5	1	2	4.64	4.002	2.176		345.11	18.35	234.95
	0	1	0	0	0	0	0	5	1	2	4.631	4.196	2.268		320.87	18.76	231.07
	0	1	0	0	0	0	0	5	1	2	4.657	4.026	2.087		326.81	18.72	215.63
	0	1	0	0	0	0	0	5	1	2	4.654	3.88	2.079		332.12	19.32	249.87
	0	1	0	0	0	0	0	5	1	2	4.677	3.866	1.995		337.37	19.43	238.07
	0	1	0	0	0	1	0	1	0	0	3.125	2.188	1.508		339.39	22.99	206.31
	0	1	0	0	0	1	0	1	0	0	3.11	2.118	1.482		335.13	23.16	201.71
	0	1	0	0	0	1	0	1	0	0	3.11	2.117	1.489		336.78	23.28	212.82
	0	1	0	0	0	1	0	1	0	0	3.123	2.198	1.496		338.31	23.01	209.62
	0	1	0	0	0	1	0	1	0	0	3.106	2.205	1.526		333.98	22.96	206.48
	0	1	0	0	0	1	0	1	0	0	3.121	2.163	1.517		332.41	22.31	201.38
	0	1	0	0	0	1	0	1	0	0	3.137	2.238	1.532		334.89	22.17	186.32
	0	1	0	0	0	1	0	1	0	0	3.135	2.17	1.479		337.5	22.58	201.84
	0	1	0	0	0	1	0	1	0	0	3.108	2.135	1.468		334.86	23.2	202.51
	0	1	0	0	0	1	0	1	0	0	3.128	2.108	1.456		325.55	23.27	185.93
	0	1	0	0	0	1	0	1	1	0	3.204	2.291	1.597		331.76	22.35	209.09
	0	1	0	0	0	1	0	1	1	0	3.185	2.247	1.543		342.71	22.62	218.41
	0	1	0	0	0	1	0	1	1	0	3.185	2.246	1.55		332.28	22.67	197.83
	0	1	0	0	0	1	0	1	1	0	3.203	2.301	1.583		341.97	22.37	229.49
	0	1	0	0	0	1	0	1	1	0	3.186	2.311	1.599		346.26	22.16	230.39
	0	1	0	0	0	1	0	1	1	0	3.201	2.269	1.602		342.61	21.6	197.09
	0	1	0	0	0	1	0	1	1	0	3.221	2.318	1.643		341.88	21.5	183.6
	0	1	0	0	0	1	0	1	1	0	3.215	2.274	1.576		335.32	21.75	202.22
	0	1	0	0	0	1	0	1	1	0	3.183	2.264	1.528		342.79	22.63	227.36
	0	1	0	0	0	1	0	1	1	0	3.203	2.235	1.532		333.42	22.63	226.26
	0	1	0	0	0	1	0	1	3	0	3.66	2.462	1.71		334.03	21.6	234.97
	0	1	0	0	0	1	0	1	3	0	3.641	2.415	1.673		342.47	21.89	251.27
	0	1	0	0	0	1	0	1	3	0	3.641	2.414	1.679		335.89	21.81	238.89
	0	1	0	0	0	1	0	1	3	0	3.658	2.472	1.696		339.47	21.58	219.03
	0	1	0	0	0	1	0	1	3	0	3.642	2.482	1.714		325.7	21.51	213.02
	0	1	0	0	0	1	0	1	3	0	3.656	2.44	1.717		329.68	21.01	223.96
	0	1	0	0	0	1	0	1	3	0	3.677	2.493	1.742		337.93	20.5	227.71
	0	1	0	0	0	1	0	1	3	0	3.671	2.445	1.689		338.61	21.18	235.81
	0	1	0	0	0	1	0	1	3	0	3.639	2.432	1.657		336.93	21.74	254.85
	0	1	0	0	0	1	0	1	3	0	3.659	2.403	1.659		330.86	22.04	247.87
	0	1	0	0	0	1	0	1	5	0	4.16	2.847	1.938		334	20.85	254.25
	0	1	0	0	0	1	0	1	5	0	4.141	2.799	1.9		332.53	21.22	245.95
	0	1	0	0	0	1	0	1	5	0	4.141	2.798	1.907		340.01	21.35	246.76
	0	1	0	0	0	1	0	1	5	0	4.158	2.857	1.924		337.39	21.09	246.11
	0	1	0	0	0	1	0	1	5	0	4.142	2.866	1.942		342.41	20.96	276.21
	0	1	0	0	0	1	0	1	5	0	4.156	2.824	1.944		345.74	20.29	248.94
	0	1	0	0	0	1	0	1	5	0	4.177	2.877	1.969		338.91	20.1	257.09
	0	1	0	0	0	1	0	1	5	0	4.171	2.829	1.917		342.58	20.67	242.01
	0	1	0	0	0	1	0	1	5	0	4.139	2.816	1.885		337.39	21.37	259.75
	0	1	0	0	0	1	0	1	5	0	4.159	2.787	1.887		331.08	21.25	263.84
	0	1	0	0	0	1	0	1	7	0	4.66	3.2	2.188		346.86	20.38	246.24
	0	1	0	0	0	1	0	1	7	0	4.641	3.153	2.15		335.91	20.96	290.59
	0	1	0	0	0	1	0	1	7	0	4.641	3.152	2.157		343.08	20.93	281.53
	0	1	0	0	0	1	0	1	7	0	4.658	3.21	2.174		346.79	20.83	284.27
	0	1	0	0	0	1	0	1	7	0	4.642	3.22	2.192		330.25	20.54	252.13
	0	1	0	0	0	1	0	1	7	0	4.656	3.178	2.194		340.85	19.93	268.37
	0	1	0	0	0	1	0	1	7	0	4.677	3.231	2.219		342.8	19.82	257.21
	0	1	0	0	0	1	0	1	7	0	4.671	3.183	2.167		347.96	20.04	255.86
	0	1	0	0	0	1	0	1	7	0	4.639	3.17	2.135		339.42	21.01	280.38
	0	1	0	0	0	1	0	1	7	0	4.659	3.141	2.137		320.33	20.93	265.93
	0	1	0	1	0	0	0	0	0	0	2.978	2.063	1.416		331.92	24.66	205.68
	0	1	0	1	0	0	0	0	0	0	2.927	2.031	1.421		339.95	24.72	212.07
	0	1	0	1	0	0	0	0	0	0	2.927	2.03	1.428		333.59	24.94	212.64
	0	1	0	1	0	0	0	0	0	0	2.977	2.075	1.392		335.37	24.82	195.24
	0	1	0	1	0	0	0	0	0	0	2.956	2.101	1.404		335.17	24.63	193.7
	0	1	0	1	0	0	0	0	0	0	2.971	2.043	1.446		316.6	24.25	190.95
	0	1	0	1	0	0	0	0	0	0	3.023	2.082	1.421		306.21	24.3	202.63
	0	1	0	1	0	0	0	0	0	0	2.989	2.033	1.41		312.44	24.43	217.22
	0	1	0	1	0	0	0	0	0	0	2.925	2.05	1.388		336.77	24.87	204.5
	0	1	0	1	0	0	0	0	0	0	2.949	2	1.418		321.49	24.82	181.4
	0	1	0	0	0	0	1	0	0	0	3.118	2.181	1.503		347.55	23.9	201.28
	0	1	0	0	0	0	1	0	0	0	3.097	2.114	1.48		333.97	23.75	190.7
	0	1	0	0	0	0	1	0	0	0	3.097	2.113	1.487		346.14	23.8	197.49
	0	1	0	0	0	0	1	0	0	0	3.117	2.192	1.488		346.65	23.66	181.09
	0	1	0	0	0	0	1	0	0	0	3.099	2.202	1.517		343.22	23.53	176.25
	0	1	0	0	0	0	1	0	0	0	3.114	2.156	1.515		368.2	22.52	191.73
	0	1	0	0	0	0	1	0	0	0	3.136	2.23	1.525		337.11	22.64	168.5
	0	1	0	0	0	0	1	0	0	0	3.129	2.161	1.476		336.55	22.7	207.18
	0	1	0	0	0	0	1	0	0	0	3.095	2.131	1.462		334.04	23.72	213.03
	0	1	0	0	0	0	1	0	0	0	3.116	2.1	1.456		344.06	23.76	198.78
	0	1	0	0	1	0	0	3	0	1	3.72	2.352	1.69		345.54	20.93	237.21
	0	1	0	0	1	0	0	3	0	1	3.697	2.314	1.668		333.89	21.31	250
	0	1	0	0	1	0	0	3	0	1	3.697	2.313	1.674		331.31	21.33	242.96
	0	1	0	0	1	0	0	3	0	1	3.718	2.362	1.675		335.44	21.26	247.96
	0	1	0	0	1	0	0	3	0	1	3.701	2.373	1.689		338.29	20.9	257.83
	0	1	0	0	1	0	0	3	0	1	3.716	2.331	1.699		339.52	20.45	222.9
	0	1	0	0	1	0	0	3	0	1	3.74	2.374	1.709		335.89	20.41	223
	0	1	0	0	1	0	0	3	0	1	3.731	2.334	1.676		333.47	20.4	214.03
	0	1	0	0	1	0	0	3	0	1	3.695	2.331	1.651		341.64	21.26	239.33
	0	1	0	0	1	0	0	3	0	1	3.715	2.3	1.66		332.22	21.23	243.71
	0	2	0	0	0	0	0	0	0	0	4.953	3.597	2.559		326.47	22.73	289.91
	0	2	0	0	0	0	0	0	0	0	5.005	3.617	2.599		338.63	23.06	260.42
	0	2	0	0	0	0	0	0	0	0	5.003	3.628	2.589		326.24	23.44	293.97
	0	2	0	0	0	0	0	0	0	0	4.971	3.581	2.542		343.4	22.87	279.21
	0	2	0	0	0	0	0	0	0	0	4.973	3.57	2.56		340.36	22.83	288.7
	0	2	0	0	0	0	0	0	0	0	4.986	3.649	2.592		327.77	22.15	252.16
	0	2	0	0	0	0	0	0	0	0	5.001	3.599	2.601		333.75	21.95	234.16
	0	2	0	0	0	0	0	0	0	0	4.984	3.546	2.539		313.45	22.25	278.37
	0	2	0	0	0	0	0	0	0	0	4.939	3.542	2.492		342.1	23.05	275.8
	0	2	0	0	0	0	0	0	0	0	4.961	3.504	2.504		329.15	23.15	294.11

## Sheet: Table S2. Normalized data set
	Table S2. Normalized data set
	Inputs														Outputs
	(Values of the normalized values of Table S1, based on the method described in Section S4 in the supplementary information )
	1	2	3	4	5	6	7	8	9	10	11	12	13		Normalized value of BDE	Normalized value of δ	Normalized value of Ebinding
	1	0	0	0	0	0	0	0	0	0	0.0136178	0.0249888	0.0240577		0.576345	0.690476	0.230559
	1	0	1	0	0	0	0	0	0	0	0.0562869	0.0655957	0.0457097		0	0.77381	0.281614
	1	0	1	0	0	0	0	0	0	0	0.0485701	0.0410531	0.0673617		0.443161	0.925595	0.42113
	1	0	1	0	0	0	0	0	0	0	0.0476623	0.0455154	0.0521251		0.499441	0.938988	0.416261
	1	0	1	0	0	0	0	0	0	0	0.0635497	0.0553324	0.0513232		0.457821	0.940476	0.147558
	1	0	1	0	0	0	0	0	0	0	0.0644576	0.0508701	0.0601443		0.557088	0.93006	0.215877
	1	0	1	0	0	0	0	0	0	0	0.0394916	0.0535475	0.0577386		0.603429	0.94494	0.286631
	1	0	1	0	0	0	0	0	0	0	0.0626419	0.0455154	0.0681636		0.406262	0.75	0.00870592
	1	0	1	0	0	0	0	0	0	0	0.0685429	0.0464079	0.0473136		0.362157	0.772321	0.268998
	1	0	1	0	0	0	0	0	0	0	0.0467544	0.0531013	0.0376905		0.566406	0.909226	0.290763
	1	0	1	0	0	0	0	0	0	0	0.0562869	0.0356983	0.0569366		0.350478	0.953869	0.18039
	1	0	0	0	0	0	0	0.2	0	0	0.16069	0.158411	0.136327		0.40974	0.540179	0.135975
	1	0	0	0	0	0	0	0.2	0	0	0.126192	0.0968318	0.178027		0.536464	0.565476	0.241405
	1	0	0	0	0	0	0	0.2	0	0	0.125738	0.104418	0.144346		0.504038	0.575893	0.283828
	1	0	0	0	0	0	0	0.2	0	0	0.172946	0.132976	0.142743		0.607405	0.605655	0.127047
	1	0	0	0	0	0	0	0.2	0	0	0.173854	0.12539	0.1668		0.624425	0.610119	0.222886
	1	0	0	0	0	0	0	0.2	0	0	0.11212	0.127622	0.163593		0.568642	0.581845	0.301239
	1	0	0	0	0	0	0	0.2	0	0	0.167045	0.114681	0.190858		0.613741	0.525298	0.111037
	1	0	0	0	0	0	0	0.2	0	0	0.177939	0.106203	0.123496		0.461921	0.532738	0.240962
	1	0	0	0	0	0	0	0.2	0	0	0.12483	0.115127	0.096231		0.481675	0.584821	0.289066
	1	0	0	0	0	0	0	0.2	0	0	0.139809	0.0767515	0.136327		0.601068	0.581845	0.269515
	1	0	0	0	0	0	0	0.2	0.428571	0	0.467998	0.365908	0.510024		0.323891	0.299107	0.289951
	1	0	0	0	0	0	0	0.2	0.428571	0	0.45665	0.30656	0.462711		0.462045	0.410714	0.397669
	1	0	0	0	0	0	0	0.2	0.428571	0	0.456196	0.312807	0.443464		0.591626	0.431548	0.440977
	1	0	0	0	0	0	0	0.2	0.428571	0	0.477985	0.352967	0.496391		0.479438	0.419643	0.137376
	1	0	0	0	0	0	0	0.2	0.428571	0	0.478892	0.347166	0.507618		0.537582	0.422619	0.412351
	1	0	0	0	0	0	0	0.2	0.428571	0	0.445302	0.322624	0.473136		0.598335	0.421131	0.430205
	1	0	0	0	0	0	0	0.2	0.428571	0	0.474807	0.335118	0.509222		0.63101	0.284226	0.377232
	1	0	0	0	0	0	0	0.2	0.428571	0	0.482978	0.335564	0.457097		0.497577	0.318452	0.478678
	1	0	0	0	0	0	0	0.2	0.428571	0	0.455288	0.321285	0.417803		0.417567	0.403274	0.410506
	1	0	0	0	0	0	0	0.2	0.428571	0	0.467544	0.29942	0.419407		0.546776	0.428571	0.343367
	1	0	0	0	0	0	0	0.2	0.714286	0	0.694961	0.533244	0.677626		0.400919	0.22619	0.476317
	1	0	0	0	0	0	0	0.2	0.714286	0	0.683613	0.473896	0.627105		0.494471	0.311012	0.649698
	1	0	0	0	0	0	0	0.2	0.714286	0	0.683159	0.480143	0.607859		0.431234	0.354167	0.66615
	1	0	0	0	0	0	0	0.2	0.714286	0	0.704948	0.520303	0.664796		0.579451	0.348214	0.686366
	1	0	0	0	0	0	0	0.2	0.714286	0	0.592374	0.43552	0.562951		0.494223	0.330357	0.675446
	1	0	0	0	0	0	0	0.2	0.714286	0	0.672265	0.48996	0.638332		0.520313	0.328869	0.549284
	1	0	0	0	0	0	0	0.2	0.714286	0	0.70177	0.502454	0.677626		0.671636	0.209821	0.540357
	1	0	0	0	0	0	0	0.2	0.714286	0	0.709941	0.5029	0.624699		0.457572	0.285714	0.48517
	1	0	0	0	0	0	0	0.2	0.714286	0	0.682251	0.488621	0.582999		0.61548	0.330357	0.726649
	1	0	0	0	0	0	0	0.2	0.714286	0	0.694507	0.466756	0.583801		0.457324	0.36756	0.595101
	1	0	0	0	0	0	0	0.2	1	0	0.921925	0.691209	0.878107		0.459063	0.202381	0.584846
	1	0	0	0	0	0	0	0.2	1	0	0.910576	0.631861	0.827586		0.545782	0.276786	0.724214
	1	0	0	0	0	0	0	0.2	1	0	0.910123	0.637662	0.80834		0.544788	0.313988	0.762506
	1	0	0	0	0	0	0	0.2	1	0	0.931911	0.678269	0.865277		0.492484	0.294643	0.721042
	1	0	0	0	0	0	0	0.2	1	0	0.932819	0.672021	0.875702		0.451857	0.297619	0.806183
	1	0	0	0	0	0	0	0.2	1	0	0.899228	0.647925	0.838813		0.504907	0.272321	0.82057
	1	0	0	0	0	0	0	0.2	1	0	0.928734	0.659973	0.878107		0.573984	0.191964	0.76553
	1	0	0	0	0	0	0	0.2	1	0	0.936904	0.660866	0.82518		0.451485	0.214286	0.710934
	1	0	0	0	0	0	0	0.2	1	0	0.909215	0.646586	0.78348		0.614362	0.3125	0.776302
	1	0	0	0	0	0	0	0.2	1	0	0.921471	0.624275	0.784282		0.403156	0.316964	0.909547
	1	0	0	0	0	0	0	1	0.142857	1	0.838402	0.960286	0.7498		0.448254	0.077381	0.434042
	1	0	0	0	0	0	0	1	0.142857	1	0.85202	0.87104	0.614274		0.628028	0.104167	0.486867
	1	0	0	0	0	0	0	1	0.142857	1	0.851112	0.876394	0.609463		0.656728	0.18006	0.543382
	1	0	0	0	0	0	0	1	0.142857	1	0.846119	0.960286	0.692061		0.53634	0.162202	0.500074
	1	0	0	0	0	0	0	1	0.142857	1	0.847027	0.955377	0.688051		0.665176	0.136905	0.58396
	1	0	0	0	0	0	0	1	0.142857	1	0.842488	0.872378	0.680032		0.514847	0.0877976	0.592814
	1	0	0	0	0	0	0	1	0.142857	1	0.845211	0.937974	0.672815		0.672133	0	0.50723
	1	0	0	0	0	0	0	1	0.142857	1	0.851112	0.949576	0.608661		0.497702	0.0431548	0.408219
	1	0	0	0	0	0	0	1	0.142857	1	0.850204	0.88398	0.606255		0.632377	0.10119	0.676996
	1	0	0	0	0	0	0	1	0.142857	1	0.860191	0.878179	0.538091		0.535098	0.153274	0.661797
	1	0	0	0	0	1	0	0.2	0	0	0.148434	0.135207	0.161989		0.609889	0.584821	0.204294
	1	0	0	0	0	1	0	0.2	0	0	0.149796	0.0937082	0.133921		0.609765	0.674107	0.313561
	1	0	0	0	0	1	0	0.2	0	0	0.148888	0.0981705	0.123496		0.656603	0.700893	0.251217
	1	0	0	0	0	1	0	0.2	0	0	0.155697	0.129407	0.148356		0.518325	0.678571	0.319463
	1	0	0	0	0	1	0	0.2	0	0	0.156605	0.124944	0.151564		0.631383	0.693452	0.352221
	1	0	0	0	0	1	0	0.2	0	0	0.141625	0.100848	0.148356		0.51025	0.703869	0.0682455
	1	0	0	0	0	1	0	0.2	0	0	0.155243	0.116466	0.151564		0.647658	0.578869	0.107496
	1	0	0	0	0	1	0	0.2	0	0	0.16069	0.121374	0.121893		0.618959	0.602679	0.151321
	1	0	0	0	0	1	0	0.2	0	0	0.14798	0.10531	0.115477		0.590508	0.705357	0.317028
	1	0	0	0	0	1	0	0.2	0	0	0.157512	0.0932619	0.105854		0.583427	0.690476	0.390807
	1	0	0	0	0	1	0	0.2	0.142857	0	0.184748	0.182508	0.222935		0.628028	0.47619	0.238232
	1	0	0	0	0	1	0	0.2	0.142857	0	0.18384	0.151272	0.183641		0.641446	0.604167	0.280876
	1	0	0	0	0	1	0	0.2	0.142857	0	0.183386	0.155734	0.172414		0.675488	0.635417	0.523388
	1	0	0	0	0	1	0	0.2	0.142857	0	0.192011	0.175368	0.218925		0.618586	0.602679	0.267818
	1	0	0	0	0	1	0	0.2	0.142857	0	0.192919	0.171352	0.223737		0.478693	0.602679	0.186661
	1	0	0	0	0	1	0	0.2	0.142857	0	0.17567	0.15975	0.186047		0.466518	0.616071	0.485023
	1	0	0	0	0	1	0	0.2	0.142857	0	0.191557	0.163766	0.221331		0.495341	0.456845	0.226133
	1	0	0	0	0	1	0	0.2	0.142857	0	0.197004	0.167782	0.199679		0.560815	0.514881	0.278663
	1	0	0	0	0	1	0	0.2	0.142857	0	0.182478	0.162874	0.163593		0.512859	0.590774	0.280065
	1	0	0	0	0	1	0	0.2	0.142857	0	0.191557	0.149933	0.1668		0.49882	0.616071	0.360853
	1	0	0	0	0	1	0	0.2	0.428571	0	0.391739	0.258367	0.315156		0.720214	0.366071	0.591191
	1	0	0	0	0	1	0	0.2	0.428571	0	0.390831	0.226238	0.287089		0.636974	0.467262	0.425483
	1	0	0	0	0	1	0	0.2	0.428571	0	0.389923	0.230701	0.276664		0.509132	0.514881	0.549063
	1	0	0	0	0	1	0	0.2	0.428571	0	0.398547	0.251673	0.309543		0.56566	0.462798	0.469456
	1	0	0	0	0	1	0	0.2	0.428571	0	0.399455	0.247657	0.314354		0.25059	0.470238	0.527962
	1	0	0	0	0	1	0	0.2	0.428571	0	0.38266	0.234717	0.291901		0.489626	0.494048	0.429394
	1	0	0	0	0	1	0	0.2	0.428571	0	0.398094	0.240071	0.313553		0.589763	0.361607	0.376494
	1	0	0	0	0	1	0	0.2	0.428571	0	0.403541	0.244087	0.290297		0.556964	0.388393	0.511141
	1	0	0	0	0	1	0	0.2	0.428571	0	0.389015	0.23784	0.267041		0.554727	0.494048	0.567729
	1	0	0	0	0	1	0	0.2	0.428571	0	0.398547	0.2249	0.268645		0.383774	0.510417	0.498008
	1	0	0	0	0	1	0	0.2	0.714286	0	0.618702	0.430165	0.497193		0.785936	0.28125	0.500812
	1	0	0	0	0	1	0	0.2	0.714286	0	0.617794	0.39759	0.469928		0.677351	0.392857	0.617604
	1	0	0	0	0	1	0	0.2	0.714286	0	0.616886	0.402053	0.458701		0.498944	0.419643	0.617604
	1	0	0	0	0	1	0	0.2	0.714286	0	0.625511	0.423472	0.492382		0.488508	0.392857	0.79696
	1	0	0	0	0	1	0	0.2	0.714286	0	0.626419	0.419009	0.497193		0.357933	0.418155	0.612144
	1	0	0	0	0	1	0	0.2	0.714286	0	0.609623	0.406515	0.473937		0.512983	0.395833	0.578943
	1	0	0	0	0	1	0	0.2	0.714286	0	0.625057	0.41187	0.495589		0.473475	0.272321	0.58278
	1	0	0	0	0	1	0	0.2	0.714286	0	0.630504	0.41544	0.472334		0.518698	0.264881	0.53261
	1	0	0	0	0	1	0	0.2	0.714286	0	0.615978	0.409192	0.44988		0.677475	0.41369	0.549801
	1	0	0	0	0	1	0	0.2	0.714286	0	0.625511	0.396252	0.451484		0.33793	0.458333	0.575476
	1	0	0	0	0	1	0	0.2	1	0	0.845665	0.58813	0.697674		0.70369	0.245536	0.474768
	1	0	0	0	0	1	0	0.2	1	0	0.844757	0.555556	0.670409		0.5469	0.330357	0.800428
	1	0	0	0	0	1	0	0.2	1	0	0.843849	0.560018	0.659182		0.67673	0.327381	0.747676
	1	0	0	0	0	1	0	0.2	1	0	0.852474	0.581437	0.692863		0.331718	0.330357	0.837686
	1	0	0	0	0	1	0	0.2	1	0	0.853382	0.576975	0.697674		0.423407	0.363095	0.821971
	1	0	0	0	0	1	0	0.2	1	0	0.836586	0.564034	0.674419		0.63188	0.333333	0.744282
	1	0	0	0	0	1	0	0.2	1	0	0.85202	0.569389	0.696071		0.586408	0.24256	0.558285
	1	0	0	0	0	1	0	0.2	1	0	0.857467	0.573405	0.672815		0.643185	0.221726	0.699203
	1	0	0	0	0	1	0	0.2	1	0	0.842941	0.567158	0.650361		0.564045	0.352679	0.887413
	1	0	0	0	0	1	0	0.2	1	0	0.852474	0.554217	0.651965		0.462915	0.36756	0.766785
	1	0	0	1	0	0	0	0	0	0	0.0807989	0.087461	0.0673617		0.0946701	0.85119	0.064409
	1	0	0	1	0	0	0	0	0	0	0.0667272	0.0539938	0.0930233		0.509753	0.915179	0.253578
	1	0	0	1	0	0	0	0	0	0	0.0658193	0.0593485	0.0737771		0.466518	0.956845	0.267818
	1	0	0	1	0	0	0	0	0	0	0.0894235	0.0736278	0.0729751		0.553858	0.952381	0.279548
	1	0	0	1	0	0	0	0	0	0	0.0903314	0.0682731	0.085004		0.33383	0.955357	0.377084
	1	0	0	1	0	0	0	0	0	0	0.0567408	0.0709505	0.0825982		0.537334	0.9375	0.347646
	1	0	0	1	0	0	0	0	0	0	0.0871539	0.0620259	0.0970329		0.314201	0.842262	0.316143
	1	0	0	1	0	0	0	0	0	0	0.0944167	0.060241	0.0657578		0.25146	0.877976	0.224657
	1	0	0	1	0	0	0	0	0	0	0.0649115	0.0673806	0.0513232		0.486023	0.919643	0.262358
	1	0	0	1	0	0	0	0	0	0	0.0758057	0.0450692	0.0753809		0.311219	0.955357	0.246348
	1	0	0	0	0	0	1	0	0	0	0.145256	0.133423	0.155573		0.5633	0.629464	0.125646
	1	0	0	0	0	0	1	0	0	0	0.143895	0.091477	0.133921		0.56653	0.754464	0.16438
	1	0	0	0	0	0	1	0	0	0	0.143441	0.0963855	0.121893		0.589514	0.785714	0.123285
	1	0	0	0	0	0	1	0	0	0	0.152973	0.126729	0.143545		0.541061	0.803571	0.218755
	1	0	0	0	0	0	1	0	0	0	0.153881	0.121821	0.148356		0.563176	0.794643	0.234248
	1	0	0	0	0	0	1	0	0	0	0.13527	0.100848	0.145148		0.590881	0.767857	0.243544
	1	0	0	0	0	0	1	0	0	0	0.152065	0.113342	0.150762		0.864704	0.581845	0.19094
	1	0	0	0	0	0	1	0	0	0	0.157966	0.117358	0.118685		0.891042	0.598214	0.180168
	1	0	0	0	0	0	1	0	0	0	0.142533	0.103525	0.111468		0.576593	0.80506	0.190128
	1	0	0	0	0	0	1	0	0	0	0.152065	0.0896921	0.105854		0.563673	0.806548	0.416261
	1	0	0	0	1	0	0	0.6	0	0.5	0.41852	0.210174	0.295108		0.393217	0.318452	0.575328
	1	0	0	0	1	0	0	0.6	0	0.5	0.416251	0.181169	0.284683		0.586036	0.388393	0.568541
	1	0	0	0	1	0	0	0.6	0	0.5	0.415797	0.185631	0.272654		0.457075	0.433036	0.659953
	1	0	0	0	1	0	0	0.6	0	0.5	0.425783	0.202588	0.293504		0.601441	0.404762	0.429541
	1	0	0	0	1	0	0	0.6	0	0.5	0.426691	0.198126	0.299118		0.444403	0.401786	0.674487
	1	0	0	0	1	0	0	0.6	0	0.5	0.40808	0.190986	0.283881		0.537582	0.428571	0.454552
	1	0	0	0	1	0	0	0.6	0	0.5	0.425329	0.191432	0.29992		0.627034	0.322917	0.41604
	1	0	0	0	1	0	0	0.6	0	0.5	0.430776	0.194556	0.27907		0.438191	0.318452	0.530766
	1	0	0	0	1	0	0	0.6	0	0.5	0.414889	0.192771	0.263031		0.631755	0.428571	0.558285
	1	0	0	0	1	0	0	0.6	0	0.5	0.423967	0.178938	0.269447		0.497577	0.419643	0.610078
	1	0.5	0	0	0	0	0	0	0	0	0.986836	0.755913	0.992783		0.52578	0.540179	0.75284
	1	0.5	0	0	0	0	0	0	0	0	0.980935	0.72066	0.966319		0.42527	0.684524	0.899144
	1	0.5	0	0	0	0	0	0	0	0	0.980027	0.725569	0.951885		0.496211	0.683036	1
	1	0.5	0	0	0	0	0	0	0	0	0.994553	0.746542	0.990377		0.526774	0.693452	0.9592
	1	0.5	0	0	0	0	0	0	0	0	0.995461	0.741633	0.998396		0.309852	0.675595	0.876494
	1	0.5	0	0	0	0	0	0	0	0	0.971857	0.732709	0.966319		0.656106	0.672619	0.953224
	1	0.5	0	0	0	0	0	0	0	0	0.993645	0.733601	0.999198		0.531992	0.552083	0.970784
	1	0.5	0	0	0	0	0	0	0	0	1	0.735386	0.971131		0.292459	0.607143	0.932197
	1	0.5	0	0	0	0	0	0	0	0	0.979119	0.733155	0.936648		0.451857	0.712798	0.66438
	1	0.5	0	0	0	0	0	0	0	0	0.98956	0.716644	0.946271		0.455585	0.72619	0.960381
	0	0.5	0	0	0	0	0	0	0	0	0	0	0		0.715493	0.706845	0.218755
	0	0.5	1	0	0	0	0	0	0	0	0.0499319	0.0298974	0.0280674		0.570009	0.97619	0.336801
	0	0.5	1	0	0	0	0	0	0	0	0.0335906	0.0200803	0.0312751		0.58616	0.985119	0.380773
	0	0.5	1	0	0	0	0	0	0	0	0.0335906	0.0196341	0.0368885		0.573239	0.970238	0.342556
	0	0.5	1	0	0	0	0	0	0	0	0.0490241	0.0343597	0.0128308		0.651634	0.980655	0.216836
	0	0.5	1	0	0	0	0	0	0	0	0.0408534	0.042838	0.0184443		0.564045	0.9375	0.354582
	0	0.5	1	0	0	0	0	0	0	0	0.0476623	0.0223115	0.0449078		0.6735	0.808036	0.928508
	0	0.5	1	0	0	0	0	0	0	0	0.0640036	0.0348059	0.0280674		0.595975	0.77381	0.137376
	0	0.5	1	0	0	0	0	0	0	0	0.0549251	0.0209728	0.0272654		0.561188	0.834821	0.271285
	0	0.5	1	0	0	0	0	0	0	0	0.0326827	0.0276662	0.0128308		0.66853	0.989583	0.321529
	0	0.5	1	0	0	0	0	0	0	0	0.0422152	0.0107095	0.0328789		0.526152	0.967262	0.372362
	0	0.5	0	0	0	0	0	0.2	0	0	0.159328	0.107095	0.120289		0.652379	0.638393	0.171241
	0	0.5	0	0	0	0	0	0.2	0	0	0.111666	0.0789826	0.126704		0.652379	0.64881	0.148296
	0	0.5	0	0	0	0	0	0.2	0	0	0.111666	0.0785364	0.134723		0.628401	0.607143	0.258521
	0	0.5	0	0	0	0	0	0.2	0	0	0.15842	0.114681	0.0874098		0.642689	0.622024	0.316881
	0	0.5	0	0	0	0	0	0.2	0	0	0.144803	0.137439	0.109062		0.629146	0.604167	0
	0	0.5	0	0	0	0	0	0.2	0	0	0.151158	0.0941544	0.169206		0.727792	0.558036	0.200384
	0	0.5	0	0	0	0	0	0.2	0	0	0.199274	0.126729	0.137129		0.634737	0.580357	0.174045
	0	0.5	0	0	0	0	0	0.2	0	0	0.164321	0.0807675	0.105052		0.649522	0.53869	0.244282
	0	0.5	0	0	0	0	0	0.2	0	0	0.110758	0.0901383	0.0713713		0.555348	0.61756	0.268408
	0	0.5	0	0	0	0	0	0.2	0	0	0.126192	0.0517626	0.112269		0.582557	0.641369	0.20813
	0	0.5	0	0	0	0	0	0.2	0.428571	0	0.464367	0.327532	0.473136		0.566654	0.418155	0.486646
	0	0.5	0	0	0	0	0	0.2	0.428571	0	0.442124	0.287372	0.423416		0.672506	0.438988	0.408883
	0	0.5	0	0	0	0	0	0.2	0.428571	0	0.442124	0.286925	0.430634		0.616723	0.455357	0.590969
	0	0.5	0	0	0	0	0	0.2	0.428571	0	0.463459	0.333333	0.453889		0.579202	0.441964	0.35591
	0	0.5	0	0	0	0	0	0.2	0.428571	0	0.453019	0.34315	0.485164		0.639707	0.4375	0.526044
	0	0.5	0	0	0	0	0	0.2	0.428571	0	0.459374	0.312361	0.489174		0.552864	0.345238	0.420245
	0	0.5	0	0	0	0	0	0.2	0.428571	0	0.48207	0.356091	0.523657		0.517456	0.327381	0.295854
	0	0.5	0	0	0	0	0	0.2	0.428571	0	0.46936	0.310129	0.437049		0.647285	0.346726	0.326029
	0	0.5	0	0	0	0	0	0.2	0.428571	0	0.441217	0.296296	0.393745		0.619083	0.434524	0.461266
	0	0.5	0	0	0	0	0	0.2	0.428571	0	0.453473	0.273985	0.395349		0.606783	0.465774	0.483252
	0	0.5	0	0	0	0	0	0.2	0.714286	0	0.69133	0.494868	0.64154		0.667661	0.349702	0.615243
	0	0.5	0	0	0	0	0	0.2	0.714286	0	0.669088	0.454708	0.588613		0.713753	0.394345	0.777335
	0	0.5	0	0	0	0	0	0.2	0.714286	0	0.669088	0.454261	0.595028		0.670394	0.383929	0.588609
	0	0.5	0	0	0	0	0	0.2	0.714286	0	0.690422	0.500669	0.622294		0.541061	0.377976	0.60093
	0	0.5	0	0	0	0	0	0.2	0.714286	0	0.679982	0.510486	0.652767		0.690769	0.340774	0.585362
	0	0.5	0	0	0	0	0	0.2	0.714286	0	0.686337	0.479697	0.657578		0.594732	0.279762	0.53925
	0	0.5	0	0	0	0	0	0.2	0.714286	0	0.709033	0.523427	0.694467		0.489378	0.261905	0.584403
	0	0.5	0	0	0	0	0	0.2	0.714286	0	0.696323	0.477465	0.604651		0.546031	0.313988	0.614136
	0	0.5	0	0	0	0	0	0.2	0.714286	0	0.66818	0.463632	0.55814		0.648528	0.354167	0.462889
	0	0.5	0	0	0	0	0	0.2	0.714286	0	0.680436	0.441321	0.559743		0.492359	0.397321	0.558949
	0	0.5	0	0	0	0	0	0.2	1	0	0.918293	0.652387	0.842021		0.680333	0.272321	0.780803
	0	0.5	0	0	0	0	0	0.2	1	0	0.896051	0.612227	0.789094		0.572245	0.315476	0.8399
	0	0.5	0	0	0	0	0	0.2	1	0	0.896051	0.61178	0.795509		0.662815	0.331845	0.868157
	0	0.5	0	0	0	0	0	0.2	1	0	0.917385	0.658188	0.822775		0.507144	0.325893	0.743102
	0	0.5	0	0	0	0	0	0.2	1	0	0.906945	0.668452	0.853248		0.51025	0.279762	0.828464
	0	0.5	0	0	0	0	0	0.2	1	0	0.9133	0.637216	0.858059		0.495714	0.255952	0.647853
	0	0.5	0	0	0	0	0	0.2	1	0	0.935996	0.680946	0.894948		0.425146	0.215774	0.673971
	0	0.5	0	0	0	0	0	0.2	1	0	0.923286	0.635431	0.805132		0.682569	0.230655	0.628966
	0	0.5	0	0	0	0	0	0.2	1	0	0.895143	0.621598	0.758621		0.570878	0.321429	0.729231
	0	0.5	0	0	0	0	0	0.2	1	0	0.907399	0.599286	0.760225		0.515965	0.31994	0.657739
	0	0.5	0	0	0	0	0	1	0.142857	1	0.832501	0.934851	0.667201		0.622935	0.122024	0.517559
	0	0.5	0	0	0	0	0	1	0.142857	1	0.83704	0.850513	0.589415		0.545161	0.208333	0.606979
	0	0.5	0	0	0	0	0	1	0.142857	1	0.83704	0.850067	0.595028		0.653373	0.181548	0.735207
	0	0.5	0	0	0	0	0	1	0.142857	1	0.831593	0.939759	0.66239		0.655858	0.166667	0.408809
	0	0.5	0	0	0	0	0	1	0.142857	1	0.823423	0.935743	0.731355		0.724811	0.169643	0.573558
	0	0.5	0	0	0	0	0	1	0.142857	1	0.829778	0.913432	0.659182		0.713132	0.0193452	0.514534
	0	0.5	0	0	0	0	0	1	0.142857	1	0.825692	1	0.732959		0.411977	0.0803571	0.485908
	0	0.5	0	0	0	0	0	1	0.142857	1	0.837494	0.924141	0.587811		0.485775	0.0744048	0.371994
	0	0.5	0	0	0	0	0	1	0.142857	1	0.836133	0.858992	0.581395		0.551746	0.16369	0.624613
	0	0.5	0	0	0	0	0	1	0.142857	1	0.846573	0.852744	0.514034		0.616971	0.18006	0.537553
	0	0.5	0	0	0	1	0	0.2	0	0	0.142079	0.103971	0.123496		0.642067	0.709821	0.303232
	0	0.5	0	0	0	1	0	0.2	0	0	0.13527	0.0727354	0.102646		0.589142	0.735119	0.269293
	0	0.5	0	0	0	1	0	0.2	0	0	0.13527	0.0722892	0.10826		0.609641	0.752976	0.351262
	0	0.5	0	0	0	1	0	0.2	0	0	0.141171	0.108434	0.113873		0.62865	0.712798	0.327652
	0	0.5	0	0	0	1	0	0.2	0	0	0.133454	0.111557	0.137931		0.574854	0.705357	0.304486
	0	0.5	0	0	0	1	0	0.2	0	0	0.140263	0.0928157	0.130714		0.555348	0.608631	0.266858
	0	0.5	0	0	0	1	0	0.2	0	0	0.147526	0.126283	0.142743		0.58616	0.587798	0.155747
	0	0.5	0	0	0	1	0	0.2	0	0	0.146618	0.0959393	0.100241		0.618586	0.64881	0.270252
	0	0.5	0	0	0	1	0	0.2	0	0	0.134362	0.0803213	0.0914194		0.585787	0.741071	0.275196
	0	0.5	0	0	0	1	0	0.2	0	0	0.143441	0.0682731	0.0817963		0.470121	0.751488	0.15287
	0	0.5	0	0	0	1	0	0.2	0.142857	0	0.177939	0.149933	0.194868		0.547273	0.614583	0.323742
	0	0.5	0	0	0	1	0	0.2	0.142857	0	0.169315	0.130299	0.151564		0.683315	0.654762	0.392504
	0	0.5	0	0	0	1	0	0.2	0.142857	0	0.169315	0.129853	0.157177		0.553733	0.662202	0.240667
	0	0.5	0	0	0	1	0	0.2	0.142857	0	0.177485	0.154395	0.183641		0.674121	0.61756	0.474251
	0	0.5	0	0	0	1	0	0.2	0.142857	0	0.169768	0.158858	0.196472		0.72742	0.58631	0.480891
	0	0.5	0	0	0	1	0	0.2	0.142857	0	0.176577	0.140116	0.198877		0.682072	0.502976	0.235207
	0	0.5	0	0	0	1	0	0.2	0.142857	0	0.185656	0.161981	0.231756		0.673003	0.488095	0.13568
	0	0.5	0	0	0	1	0	0.2	0.142857	0	0.182932	0.142347	0.178027		0.591502	0.525298	0.273056
	0	0.5	0	0	0	1	0	0.2	0.142857	0	0.168407	0.137885	0.139535		0.684309	0.65625	0.458536
	0	0.5	0	0	0	1	0	0.2	0.142857	0	0.177485	0.124944	0.142743		0.567897	0.65625	0.450421
	0	0.5	0	0	0	1	0	0.2	0.428571	0	0.38493	0.226238	0.285485		0.575475	0.502976	0.514682
	0	0.5	0	0	0	1	0	0.2	0.428571	0	0.376305	0.205266	0.255814		0.680333	0.546131	0.634942
	0	0.5	0	0	0	1	0	0.2	0.428571	0	0.376305	0.204819	0.260626		0.598584	0.534226	0.543603
	0	0.5	0	0	0	1	0	0.2	0.428571	0	0.384022	0.230701	0.274258		0.643061	0.5	0.397078
	0	0.5	0	0	0	1	0	0.2	0.428571	0	0.376759	0.235163	0.288693		0.471984	0.489583	0.352737
	0	0.5	0	0	0	1	0	0.2	0.428571	0	0.383114	0.216421	0.291099		0.521431	0.415179	0.433451
	0	0.5	0	0	0	1	0	0.2	0.428571	0	0.392646	0.240071	0.311147		0.623928	0.339286	0.461118
	0	0.5	0	0	0	1	0	0.2	0.428571	0	0.389923	0.218652	0.268645		0.632377	0.440476	0.520879
	0	0.5	0	0	0	1	0	0.2	0.428571	0	0.375397	0.212851	0.242983		0.611505	0.52381	0.661355
	0	0.5	0	0	0	1	0	0.2	0.428571	0	0.384476	0.199911	0.244587		0.536091	0.568452	0.609857
	0	0.5	0	0	0	1	0	0.2	0.714286	0	0.611893	0.398037	0.468324		0.575102	0.391369	0.656928
	0	0.5	0	0	0	1	0	0.2	0.714286	0	0.603268	0.376618	0.437851		0.556839	0.446429	0.595691
	0	0.5	0	0	0	1	0	0.2	0.714286	0	0.603268	0.376171	0.443464		0.64977	0.465774	0.601667
	0	0.5	0	0	0	1	0	0.2	0.714286	0	0.610985	0.402499	0.457097		0.61722	0.427083	0.596872
	0	0.5	0	0	0	1	0	0.2	0.714286	0	0.603722	0.406515	0.471532		0.679588	0.407738	0.818946
	0	0.5	0	0	0	1	0	0.2	0.714286	0	0.610077	0.387773	0.473136		0.720959	0.308036	0.617751
	0	0.5	0	0	0	1	0	0.2	0.714286	0	0.61961	0.411423	0.493184		0.636104	0.279762	0.677881
	0	0.5	0	0	0	1	0	0.2	0.714286	0	0.616886	0.390004	0.451484		0.6817	0.364583	0.566622
	0	0.5	0	0	0	1	0	0.2	0.714286	0	0.60236	0.384203	0.425822		0.61722	0.46875	0.697506
	0	0.5	0	0	0	1	0	0.2	0.714286	0	0.611439	0.371263	0.427426		0.538825	0.450893	0.727682
	0	0.5	0	0	0	1	0	0.2	1	0	0.838856	0.555556	0.668805		0.734874	0.321429	0.597831
	0	0.5	0	0	0	1	0	0.2	1	0	0.830232	0.534583	0.638332		0.598832	0.407738	0.925041
	0	0.5	0	0	0	1	0	0.2	1	0	0.830232	0.534137	0.643945		0.687912	0.403274	0.858197
	0	0.5	0	0	0	1	0	0.2	1	0	0.837948	0.560018	0.657578		0.734004	0.388393	0.878412
	0	0.5	0	0	0	1	0	0.2	1	0	0.830685	0.56448	0.672013		0.528513	0.345238	0.641287
	0	0.5	0	0	0	1	0	0.2	1	0	0.83704	0.545739	0.673617		0.660206	0.254464	0.761104
	0	0.5	0	0	0	1	0	0.2	1	0	0.846573	0.569389	0.693665		0.684433	0.238095	0.678766
	0	0.5	0	0	0	1	0	0.2	1	0	0.843849	0.54797	0.651965		0.74854	0.270833	0.668806
	0	0.5	0	0	0	1	0	0.2	1	0	0.829324	0.542169	0.626303		0.64244	0.415179	0.849712
	0	0.5	0	0	0	1	0	0.2	1	0	0.838402	0.529228	0.627907		0.405268	0.403274	0.743102
	0	0.5	0	1	0	0	0	0	0	0	0.0753518	0.0481928	0.0497193		0.549261	0.958333	0.298583
	0	0.5	0	1	0	0	0	0	0	0	0.0522015	0.0339134	0.0537289		0.649025	0.967262	0.345728
	0	0.5	0	1	0	0	0	0	0	0	0.0522015	0.0334672	0.0593424		0.570009	1	0.349934
	0	0.5	0	1	0	0	0	0	0	0	0.0748979	0.0535475	0.0304731		0.592123	0.982143	0.221558
	0	0.5	0	1	0	0	0	0	0	0	0.0653654	0.0651495	0.0400962		0.589638	0.953869	0.210196
	0	0.5	0	1	0	0	0	0	0	0	0.0721743	0.0392682	0.0737771		0.358927	0.897321	0.189907
	0	0.5	0	1	0	0	0	0	0	0	0.0957785	0.0566711	0.0537289		0.229842	0.904762	0.276081
	0	0.5	0	1	0	0	0	0	0	0	0.080345	0.0348059	0.0449078		0.307243	0.924107	0.383724
	0	0.5	0	1	0	0	0	0	0	0	0.0512937	0.0423918	0.0272654		0.609517	0.989583	0.289878
	0	0.5	0	1	0	0	0	0	0	0	0.0621879	0.0200803	0.0513232		0.419679	0.982143	0.119448
	0	0.5	0	0	0	0	1	0	0	0	0.138901	0.100848	0.119487		0.743446	0.845238	0.266121
	0	0.5	0	0	0	0	1	0	0	0	0.129369	0.0709505	0.101043		0.57473	0.822917	0.188063
	0	0.5	0	0	0	0	1	0	0	0	0.129369	0.0705042	0.106656		0.725929	0.830357	0.238158
	0	0.5	0	0	0	0	1	0	0	0	0.138448	0.105756	0.107458		0.732265	0.809524	0.117161
	0	0.5	0	0	0	0	1	0	0	0	0.130277	0.110219	0.130714		0.689651	0.790179	0.081452
	0	0.5	0	0	0	0	1	0	0	0	0.137086	0.0896921	0.12911		1	0.639881	0.195662
	0	0.5	0	0	0	0	1	0	0	0	0.147072	0.122713	0.137129		0.613741	0.657738	0.0242733
	0	0.5	0	0	0	0	1	0	0	0	0.143895	0.0919232	0.0978348		0.606783	0.666667	0.30965
	0	0.5	0	0	0	0	1	0	0	0	0.128461	0.0785364	0.0866079		0.575599	0.818452	0.352811
	0	0.5	0	0	0	0	1	0	0	0	0.137994	0.0647033	0.0817963		0.700087	0.824405	0.247676
	0	0.5	0	0	1	0	0	0.6	0	0.5	0.412165	0.177153	0.269447		0.718474	0.403274	0.531208
	0	0.5	0	0	1	0	0	0.6	0	0.5	0.401725	0.160196	0.251804		0.573736	0.459821	0.625572
	0	0.5	0	0	1	0	0	0.6	0	0.5	0.401725	0.15975	0.256616		0.541682	0.462798	0.573631
	0	0.5	0	0	1	0	0	0.6	0	0.5	0.411257	0.181615	0.257418		0.592993	0.452381	0.610521
	0	0.5	0	0	1	0	0	0.6	0	0.5	0.403541	0.186524	0.268645		0.628401	0.39881	0.683341
	0	0.5	0	0	1	0	0	0.6	0	0.5	0.41035	0.167782	0.276664		0.643682	0.331845	0.425631
	0	0.5	0	0	1	0	0	0.6	0	0.5	0.421244	0.18697	0.284683		0.598584	0.325893	0.426369
	0	0.5	0	0	1	0	0	0.6	0	0.5	0.417158	0.169121	0.25822		0.568518	0.324405	0.360189
	0	0.5	0	0	1	0	0	0.6	0	0.5	0.400817	0.167782	0.238172		0.670021	0.452381	0.54685
	0	0.5	0	0	1	0	0	0.6	0	0.5	0.409896	0.153949	0.245389		0.552988	0.447917	0.579165
	0	1	0	0	0	0	0	0	0	0	0.971857	0.732709	0.966319		0.481551	0.671131	0.920024
	0	1	0	0	0	0	0	0	0	0	0.995461	0.741633	0.998396		0.632625	0.720238	0.702449
	0	1	0	0	0	0	0	0	0	0	0.994553	0.746542	0.990377		0.478693	0.776786	0.949978
	0	1	0	0	0	0	0	0	0	0	0.980027	0.725569	0.952686		0.691887	0.691964	0.84108
	0	1	0	0	0	0	0	0	0	0	0.980935	0.72066	0.967121		0.654119	0.686012	0.911096
	0	1	0	0	0	0	0	0	0	0	0.986836	0.755913	0.992783		0.497702	0.584821	0.641508
	0	1	0	0	0	0	0	0	0	0	0.993645	0.733601	1		0.571997	0.55506	0.508706
	0	1	0	0	0	0	0	0	0	0	0.985928	0.709951	0.950281		0.319791	0.599702	0.834883
	0	1	0	0	0	0	0	0	0	0	0.965502	0.708166	0.91259		0.675736	0.71875	0.815921
	0	1	0	0	0	0	0	0	0	0	0.975488	0.691209	0.922213		0.514847	0.733631	0.951011
